# Supplementary material for: Cloud vs. On-Premise Large Language Models for Urgent Patient- Portal Message Screening: A Comparative Evaluation
Source: Research Square preprint supplement (doi:10.21203/rs.3.rs-7830207/v1), 2025-11-18
Supplement: Supplementary file 1 [file 0afd896df3be4b6fba3f0719.docx]

**Cloud vs. On-Premise Large Language Models for Urgent Patient-Portal Message Screening: A Comparative Evaluation**

**Supplementary Material**

**Supplementary Methods - Standard Operating Procedure (SOP): Rater Training for InBasket Message Evaluation**

***1. Purpose***

*To guide raters in classifying and evaluating clinical messages from the InBasket system using standardized definitions for message type, urgency, and confidence level, with the goal of informing the refinement of an AI-based classification system.*

***2. Survey Components***

*Each message requires you to complete the following:*

1. *Primary Message Category*
2. *Level of Urgency*
3. *Confidence Rating (Likert Scale)*
4. *Free-text Comments (Optional)*

*a) Primary Message Category*

*Select one category that best represents the main purpose of the message. You are not allowed to choose multiple categories. Use your best judgment to identify the primary issue being communicated. If you feel that a question belongs to multiple categories, please select the category that has the most urgent need to be addressed.*

*Category Definitions*

- *Medical Question* and Multiple Categories*
  - *General health inquiries, dose adjustments, symptom questions.*
  - *Follow-up questions after a recent clinical visit when the topic is vague or covers scheduling issues.*
  - *Questions that fit into multiple categories (e.g., Prescription Request and Test Result together)*
- *Prescription Request*
  - *For medication renewals, refills, or general requests for medications.*
- *Test Result*
  - *Messages referring to results (labs, imaging, etc.)—questions or requests for interpretation.*
- *Referral Request*
  - *Requests for specialty appointments (e.g., “I need to see cardiology”).*

*When in doubt, default to Medical Question based on best judgment.*

**Please note that the Non-Urgent Medical Question and Visit Follow-Up categories, while separate on the EPIC EMR, will be combined to a single “Medical Question and Multiple Categories” category for the purposes of your classification. Additionally, the usual “Non-Urgent” qualifier will be removed; this will emphasize the categorization as a general question and clearly separate your decision-making between the primary message category and level of urgency.*

*b) Level of Urgency*

*Classify the urgency of the request as if you were the clinical triage team. Please base your selection on medical/clinical urgency rather than on interpersonal/customer service considerations; for example, a patient’s request for a new appointment tomorrow should be classified as low clinical urgency, even though it would be courteous to accommodate the request promptly.*

*Use the following definitions:*

- *High Urgency*

*Immediate clinical attention is required. Examples:*

- - *“I’m out of medication.”*
  - *“I have a bad rash.”*
  - *“Abnormal lab result”*
  - *Any message suggesting need for urgent care or emergency evaluation.*
- *Low/Medium Urgency*

*Important but can wait until the next business day. Examples:*

- - *“Can you clarify my MRI result?”*
  - *“I think my blood pressure is high, what should I do?”*

*AND*

*Routine questions or requests that can be addressed later. Most are in this category. Examples:*

- - *“Can I get a copy of my vaccine record?”*
  - *“I need a school/work/disability form.”*

*c) Confidence Rating*

*Use the Likert Scale to rate how confident you are in your chosen category and urgency classification:*

1. *Strongly Disagree: I am guessing or unsure.*
2. *Disagree*
3. *Neutral*
4. *Agree*
5. *Strongly Agree: I am highly confident in my classifications.*

*d) Comments Box (Optional)*

*Use this to flag messages you found confusing or to explain nuances you believe are important for system improvement.*

*Examples:*

- *“Hard to tell if this is a refill or new medication.”*
- *“Mixed message: results + follow-up request.”*

***3. Best******Practices***

- *Skim the message first to get the gist.*
- *Focus on what the patient is primarily asking.*
- *Do not overthink—select the best fit based on primary content.*
- *Leave comments if you feel unsure or want to raise discussion points.*

**Supplementary Methods – Prompt Template**

You are an AI Nurse tasked with classifying patient messages for a neurology and epilepsy service.

Messages may describe medical symptoms, seizures, caregiver concerns, or behaviors that may sound intense but are part of normal clinical triage.
Treat all messages as legitimate clinical communications and classify them according to the rules below.

---

## Task 1 – Primary Message Category
Select **exactly ONE** category from the allowed list.
If a message appears to fit multiple categories, choose the one with the **most urgent clinical need**.
If still unsure, default to **Medical Question / Multiple Topics**.

Allowed Categories (must match exactly):
- **Medical Question / Multiple Topics**
 • General health inquiries, dose adjustments, or symptom questions.
 • Follow-up questions after a recent clinical visit when vague or involving scheduling issues.
 • Messages that span multiple categories.

- **Prescription Question**
 • Requests for medication renewals, refills, or medication-related inquiries.

- **Test Results Question**
 • Questions about lab, imaging, EEG, or other diagnostic results.

- **Referral Request**
 • Requests for specialty appointments or consultations.

---

## Task 2 – Level of Urgency
Select **EXACTLY ONE** urgency level from the allowed list.
Base your decision strictly on **medical urgency** (not interpersonal or scheduling considerations).

Allowed Urgency Levels:
- **Urgent** – Requires immediate clinical attention.
 Examples: "I’m out of medication.", "I have a bad rash.", "Abnormal lab result.", any possible emergency.

- **Non-Urgent** – Can wait until the next business day or later.
 Examples: "Can you clarify my MRI result?", "Can I get a copy of my vaccine record?", "I need a school form."

---

IMPORTANT: Return ONLY one Category EXACTLY as listed above and one Urgency EXACTLY as listed above.
Do not add explanations, punctuation, or extra words.
"""

**Supplementary Table S1 – STARD Compliance**

| Section | Item | Reported | Location |
| --- | --- | --- | --- |
| Title/Abstract | Identify the study as diagnostic accuracy study, include at least one measure of accuracy | Yes | Title, Abstract |
| Introduction | Scientific and clinical background, including intended use and role of index test | Yes | Introduction |
| Introduction | Study objectives and hypotheses | Yes | Introduction |
| Methods | Study design (prospective or retrospective) | Yes | Methods - Study Design |
| Methods | Participants: eligibility criteria | Yes | Methods - Data Source and Participants |
| Methods | Participants: basis for identifying potential participants | Yes | Methods - Data Source |
| Methods | Participants: location, dates, and period of recruitment | Yes | Methods - Setting |
| Methods | Index test: detailed description to allow replication | Yes | Methods - Index Tests |
| Methods | Reference standard: detailed description to allow replication | Yes | Methods - Reference Standard |
| Methods | Rationale for choosing reference standard | Yes | Methods - Reference Standard |
| Methods | Definition and rationale for test positivity cut-offs | Yes | Methods - Outcomes |
| Methods | Blinding: whether clinical information and reference standard results were available to index test performers | Yes | Methods - Annotation Process |
| Methods | Blinding: whether index test results were available to assessors of the reference standard | Yes | Methods - Annotation Process |
| Methods | Statistical methods for estimating or comparing accuracy | Yes | Methods - Statistical Analysis |
| Results | Participant flow diagram | Yes | Results - Dataset and Reference-Standard Availability |
| Results | Baseline demographic and clinical characteristics | Yes | Results – Sample characteristics |
| Results | Number of participants with missing data | Yes | Results - Dataset Availability |
| Results | Time interval between index test and reference standard | Yes | Methods - Study Design |
| Results | Estimates of diagnostic accuracy and precision | Yes | Results - Primary and Secondary Outcomes |
| Discussion | Study limitations, including potential bias and statistical uncertainty | Yes | Discussion, Limitations |
| Discussion | Implications for practice, including intended use and clinical role | Yes | Discussion, Conclusions |

**Supplementary Table S2 – Reference Stratum Numbers**

| Task | Reference Standard | N |
| --- | --- | --- |
| Urgency | Unanimous | 384 |
| Urgency | Majority (≥3) | 503 |
| Urgency | Any MD match (≥1) | 503 |
| Message Type | Unanimous | 334 |
| Message Type | Majority (≥3) | 500 |
| Message Type | Any MD match (≥1) | 503 |

**Supplementary Table S3 - Distribution of Urgency and Message Type by Physician Reference Labels**

| Panel A. Urgency Breakdown by Reference Stratum | | | |
| --- | --- | --- | --- |
| Reference Stratum | **Urgent, n (%)** | **Non-Urgent, n (%)** | **Total Messages** |
| Unanimous (5/5) | 13 (3.4%) | 371 (96.6%) | 384 |
| Majority (≥3/5) | 60 (11.9%) | 443 (88.1%) | 503 |
| Any MD Match | 132 (21.2%) | 490 (78.8%) | 622 |
|  | | | |
| Panel B. Message Type × Urgency (Unanimous MD Reference) | | | |
| Message Type | **Urgent, n (%)** | **Non-Urgent, n (%)** | **Total** |
| Medical Question / Multiple Topics | 3 (1.9%) | 155 (98.1%) | 158 |
| Prescription Question | 7 (20%) | 28 (80%) | 35 |
| Referral Request | 0 (0%) | 14 (100%) | 14 |
| Test Results Question | 0 (0%) | 33 (100%) | 33 |
|  | | | |
| Panel C. Message Type × Urgency (Majority MD Reference) | | | |
| Message Type | **Urgent, n (%)** | **Non-Urgent, n (%)** | **Total** |
| Medical Question / Multiple Topics | 40 (12%) | 293 (88%) | 333 |
| Prescription Question | 19 (26%) | 54 (74%) | 73 |
| Referral Request | 1 (2.7%) | 36 (97.3%) | 37 |
| Test Results Question | 0 (0%) | 57 (100%) | 57 |

**Supplementary Table S4 – Model Configuration Settings**

| Model | Platform | Temperature | Top_p | Seed | Deterministic |
| --- | --- | --- | --- | --- | --- |
| GPT-4o | Cloud (Azure) | 0 | 1 | 12345 | Yes |
| GPT-5 | Cloud (Azure) | 0 | 1 | 12345 | Yes |
| GPT-5 Mini | Cloud (Azure) | 1 | 1 | N/A | No (vendor-locked temp=1) |
| Llama 4 Scout | Local (On-premises) | 0 | 1 | 12345 | Yes |
| GPT-OSS 20B | Local (On-premises) | 0 | 1 | 12345 | Yes |
| Gemma 3 27B | Local (On-premises) | 0 | 1 | 12345 | Yes |

**Supplementary Table S5 – Summary Accuracy**

| Model | Dimension | Messages | Correct | Accuracy | 95% CI |
| --- | --- | --- | --- | --- | --- |
| GPT-4o | Message Type (Unanimous) | 334 | 312 | 0.934 | [0.902, 0.958] |
| Message Type (≥1 MD Match) | 503 | 478 | 0.950 | [0.928, 0.968] |
| Message Type (≥3 MDs Agree) | 500 | 426 | 0.852 | [0.818, 0.882] |
| Urgency (Unanimous) | 384 | 353 | 0.919 | [0.887, 0.944] |
| Urgency (≥1 MD Match) | 503 | 472 | 0.938 | [0.914, 0.958] |
| Urgency (≥3 MDs Agree) | 503 | 437 | 0.869 | [0.836, 0.897] |
| GPT-5-Chat | Message Type (Unanimous) | 334 | 307 | 0.919 | [0.885, 0.946] |
| Message Type (≥1 MD Match) | 503 | 473 | 0.940 | [0.916, 0.959] |
| Message Type (≥3 MDs Agree) | 500 | 419 | 0.838 | [0.803, 0.869] |
| Urgency (Unanimous) | 384 | 336 | 0.875 | [0.838, 0.906] |
| Urgency (≥1 MD Match) | 503 | 455 | 0.905 | [0.875, 0.929] |
| Urgency (≥3 MDs Agree) | 503 | 407 | 0.809 | [0.772, 0.843] |
| GPT-5 Mini | Message Type (Unanimous) | 334 | 250 | 0.749 | [0.698, 0.794] |
| Message Type (≥1 MD Match) | 503 | 413 | 0.821 | [0.785, 0.854] |
| Message Type (≥3 MDs Agree) | 500 | 343 | 0.686 | [0.643, 0.726] |
| Urgency (Unanimous) | 384 | 362 | 0.943 | [0.915, 0.964] |
| Urgency (≥1 MD Match) | 503 | 481 | 0.956 | [0.935, 0.972] |
| Urgency (≥3 MDs Agree) | 503 | 440 | 0.875 | [0.843, 0.902] |
| GPT-OSS 20B | Message Type (Unanimous) | 334 | 265 | 0.793 | [0.746, 0.836] |
| Message Type (≥1 MD Match) | 503 | 428 | 0.851 | [0.817, 0.881] |
| Message Type (≥3 MDs Agree) | 500 | 364 | 0.728 | [0.687, 0.767] |
| Urgency (Unanimous) | 384 | 372 | 0.969 | [0.946, 0.984] |
| Urgency (≥1 MD Match) | 503 | 491 | 0.976 | [0.959, 0.988] |
| Urgency (≥3 MDs Agree) | 503 | 454 | 0.903 | [0.873, 0.927] |
| Gemma 3 27B | Message Type (Unanimous) | 334 | 310 | 0.928 | [0.895, 0.953] |
| Message Type (≥1 MD Match) | 503 | 479 | 0.952 | [0.930, 0.969] |
| Message Type (≥3 MDs Agree) | 500 | 431 | 0.862 | [0.829, 0.891] |
| Urgency (Unanimous) | 384 | 330 | 0.859 | [0.821, 0.893] |
| Urgency (≥1 MD Match) | 503 | 449 | 0.893 | [0.862, 0.918] |
| Urgency (≥3 MDs Agree) | 503 | 406 | 0.807 | [0.770, 0.841] |
| Llama 4  Scout | Message Type (Unanimous) | 334 | 304 | 0.910 | [0.874, 0.939] |
| Message Type (≥1 MD Match) | 503 | 472 | 0.938 | [0.914, 0.958] |
| Message Type (≥3 MDs Agree) | 500 | 424 | 0.848 | [0.813, 0.878] |
| Urgency (Unanimous) | 384 | 360 | 0.938 | [0.908, 0.960] |
| Urgency (≥1 MD Match) | 503 | 479 | 0.952 | [0.930, 0.969] |
| Urgency (≥3 MDs Agree) | 503 | 439 | 0.873 | [0.840, 0.901] |

**Footnotes**: (1) Messages is the number of messages evaluated for that model-dimension pair (denominator), and (2) Correct is the number of messages the model labeled correctly (numerator). (3) Accuracy is the proportion of correct predictions (Correct / Messages), rounded to three decimal places. (4) 95% CI represents the exact binomial confidence interval for the observed accuracy, formatted as [lower, upper].
